# Supplementary material for: Ultrafast charge-conversional nanocarrier for tumor-acidity-activated targeted drug elivery
Source: Royal Society of Chemistry journal article supplement (doi:10.1039/c7bm01025g), 2017-11-29
Supplement: c7bm01025g1.pdf [file c7bm01025g1.pdf]

## **Ultrafast Charge-Conversional Nanocarrier for Tumor-Acidity-Activated Targeted Drug Delivery**

Jing Liu<sup>1</sup>, Shoaib Iqbal<sup>1</sup>, Xiao-Jiao Du<sup>2</sup>, Youyong Yuan<sup>2</sup>, Xianzhu Yang<sup>2</sup>, Hong-Jun Li<sup>2,4\*</sup>, and Jun Wang<sup>1,2,3,5\*</sup>

<sup>1</sup> School of Life Sciences, University of Science and Technology of China, Hefei, Anhui 230027, P. R. China

<sup>2</sup> Institutes for Life Sciences, and School of Medicine, South China University of Technology, Guangzhou, Guangdong 510006, P. R. China

<sup>3</sup> National Engineering Research Center for Tissue Restoration and Reconstruction, Guangzhou, Guangdong 510006, P. R. China

<sup>4</sup> Key Laboratory of Biomedical Materials of Ministry of Education, South China University of Technology, Guangzhou 510641, P. R. China

<sup>5</sup> Research Institute for Food Nutrition and Human Health, South China University of Technology, Guangzhou 510641, P. R. China

\*To whom correspondence should be addressed. Jun Wang, Email: mcjwang@scut.edu.cn (J.W.), Tel: 86-20-39380992; Hong-Jun Li, Email: lihj0816@scut.edu.cn (H.J.L.), Tel: 86-20-39380989.

### **Preparation of PEG<sub>113</sub>-*b*-PCEA<sub>50</sub>-*b*-PCHMA<sub>85</sub>.**

The control materials preparation was similar with PEG<sub>113</sub>-*b*-PCEA<sub>50</sub>-*b*-PAEMA<sub>85</sub>. Briefly, mPEG<sub>113</sub>-*b*-PCEA<sub>50</sub> (0.20 g, 1.0 eqv.), CHMA (0.49 g, 140.0 eqv.) and AIBN (1.2 mg, 0.33 eqv.) were dissolved in anhydrous DMF, after stirring at 80 °C for 10 h, the product was precipitated into cold hexane twice and obtained the final product PEG<sub>113</sub>-*b*-PCEA<sub>50</sub>-*b*-PCHMA<sub>85</sub>. <sup>1</sup>H NMR (400 MHz, DMSO-d<sub>6</sub>, ppm): 4.45-4.05 (m, 270 H), 3.51 (m, 454 H), 2.56 (m, 100 H), 2.21 (m, 51 H), 0.75-2.00 (m, 1650 H).

### **Preparation of NP3/Pt.**

PEG-*b*-PCEA-*b*-PCHMA was dissolved in hot DMF at the concentration of 10 mg/mL, and then 0.5 mL of PEG-*b*-PCEA-*b*-PCHMA solutions were added into 5 mL of hot water dropwise to form nanoparticle by self-assemble. Then the mixture was purified by dialysis in water with a dialysis bag (MWCO = 14,000 Da) to remove DMF. After that, cisplatin was added into the mixture to crosslink the nanoparticle by reacting with carboxyl groups. After 48 h, the shell-crosslinked nanoparticle was purified by dialysis against water with a dialysis bag (MWCO = 14,000 Da) to remove unreacted cisplatin. The platinum content in the NP3/Pt was measured by ICP-MS.

### **Preparation of rhodamine labeled UCC-NP3/Pt and NP3/Pt.**

For the <sup>Rho</sup>B<sub>UCC</sub>-NP3/Pt and <sup>Rho</sup>B<sub>NP3/Pt</sub> preparation, 100 μL of ethanediamine (with the concentration of 2 mg/mL), 100 μL of NHS (with the concentration of 4 mg/mL), and 2 mL of UCC-NP3/Pt or NP3/Pt (with the concentration of 1 mg/mL) were mixed and stirred for 24 h, after that, 10 μL of Rhodamine B isothiocyanate (with the concentration of 1 mg/mL) was added to the solutions and reacted further 4 h, then the mixture was purified by dialysis in water with a dialysis bag (MWCO = 14,000 Da) to remove unconjugated fluorescent probe.

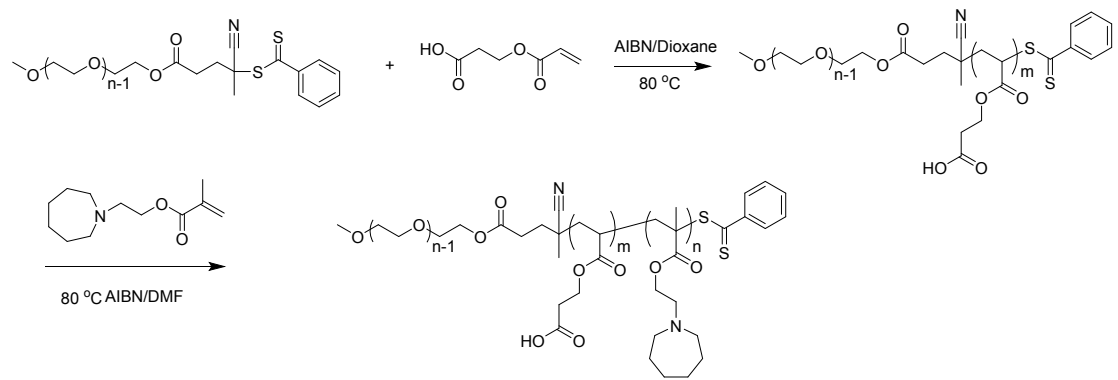

Scheme S1. Synthetic routes of PEG-*b*-PCEA-*b*-PAEMA.

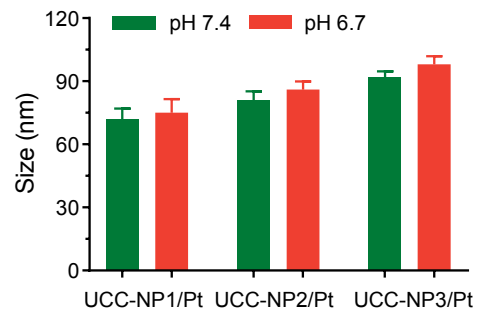

Figure S1. The sizes of UCC-NP1/Pt, UCC-NP2/Pt and UCC-NP3/Pt after incubated in PB buffer with pH 7.4 and 6.7.

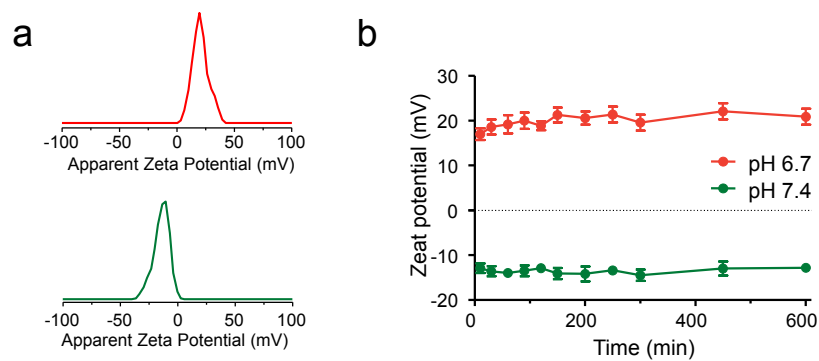

Figure S2. (a) The surface charge of UCC-NP3/Pt at pH 7.4 (green) and pH 6.7 (red), (b) zeta potential of UCC-NP3/Pt after incubated at PB buffer with pH 6.7 and pH 7.4.

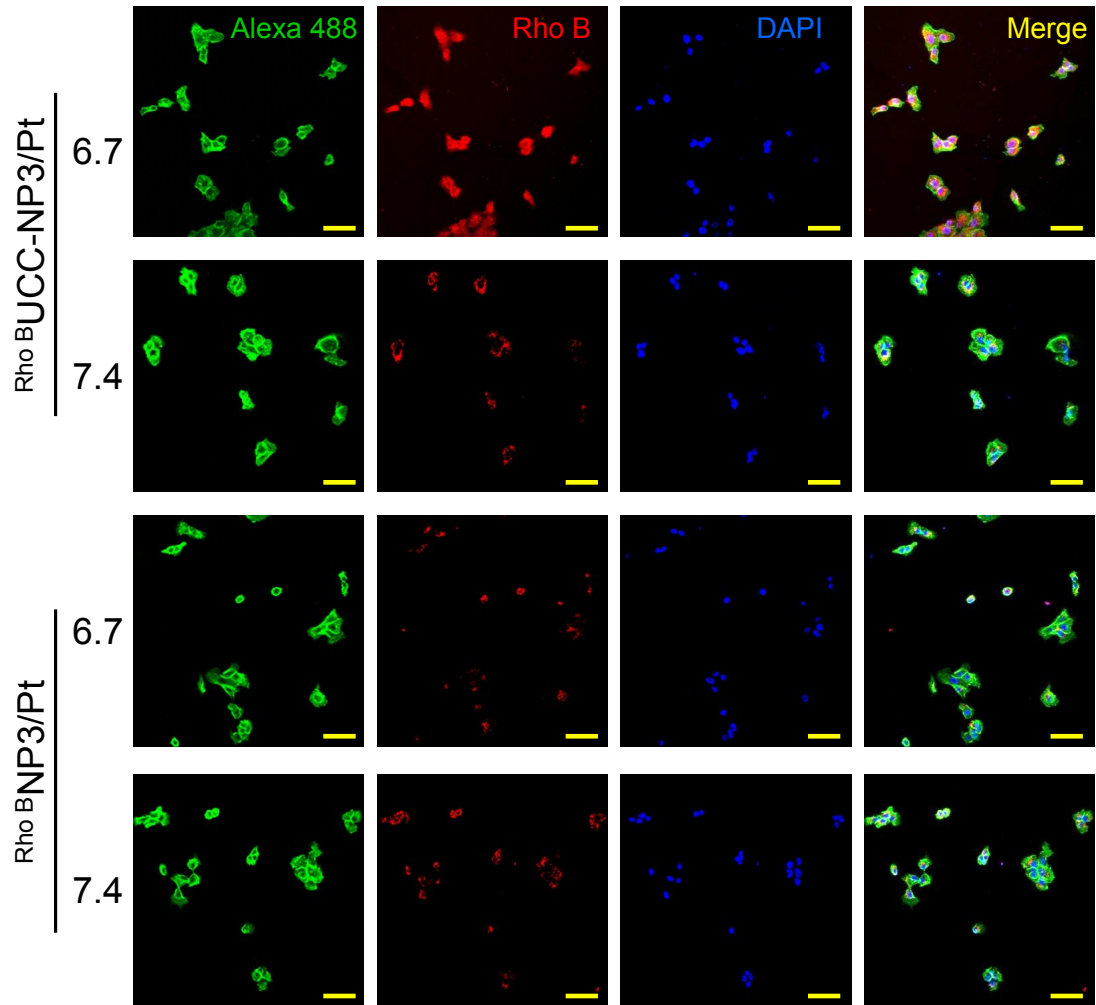

Figure S3. The images of A549R cells incubated with rhodamine B labeled shell-crosslinked nanoparticle ( $\text{Rho}^{\text{B}}\text{UCC-NP3/Pt}$  and  $\text{Rho}^{\text{B}}\text{NP3/Pt}$ ) in DMEM medium at pH 6.7 and pH 7.4. The Cytoskeletal F-actin and nuclei of the cells were stained with Alexa Fluor 488 phalloidin (green) and 4', 6-diamidino-2-phenylindole (DAPI; blue), respectively. Scale bar = 50  $\mu\text{m}$ .

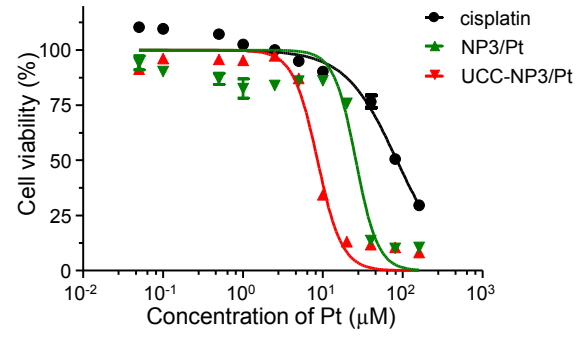

Figure S4. The cell viability of SGC-7901R cells after various treatments at pH 6.7 for 24 h.

|                | UCC-NP3/Pt     | NP3/Pt         |
|----------------|----------------|----------------|
| Size           | 92 ± 2.8 nm    | 90 ± 5.5 nm    |
| Zeta potential | -14.3 ± 2.1 mV | -14.8 ± 3.3 mV |
| Drug content   | 18.7 ± 1.6 %   | 19.3 ± 2.2 %   |

Table S1. The size, zeta potential and Pt drug content of UCC-NP3/Pt and NP3/Pt.



|            | A549R         | SGC-7901R     |
|------------|---------------|---------------|
| Cisplatin  | 43.74 $\mu$ M | 84.94 $\mu$ M |
| NP3/Pt     | 8.56 $\mu$ M  | 26.00 $\mu$ M |
| UCC-NP3/Pt | 1.75 $\mu$ M  | 8.61 $\mu$ M  |

Table S2. The IC50 values of A549R and SGC-7901R cells after treated with cisplatin, NP3/Pt and UCC-NP3/Pt.
